# Supplementary material
Source: PubMed Central journal article supplement (PMC8749411)
Supplement: mbio.03379-21-sf002.pdf [file mbio.03379-21-sf002.pdf]

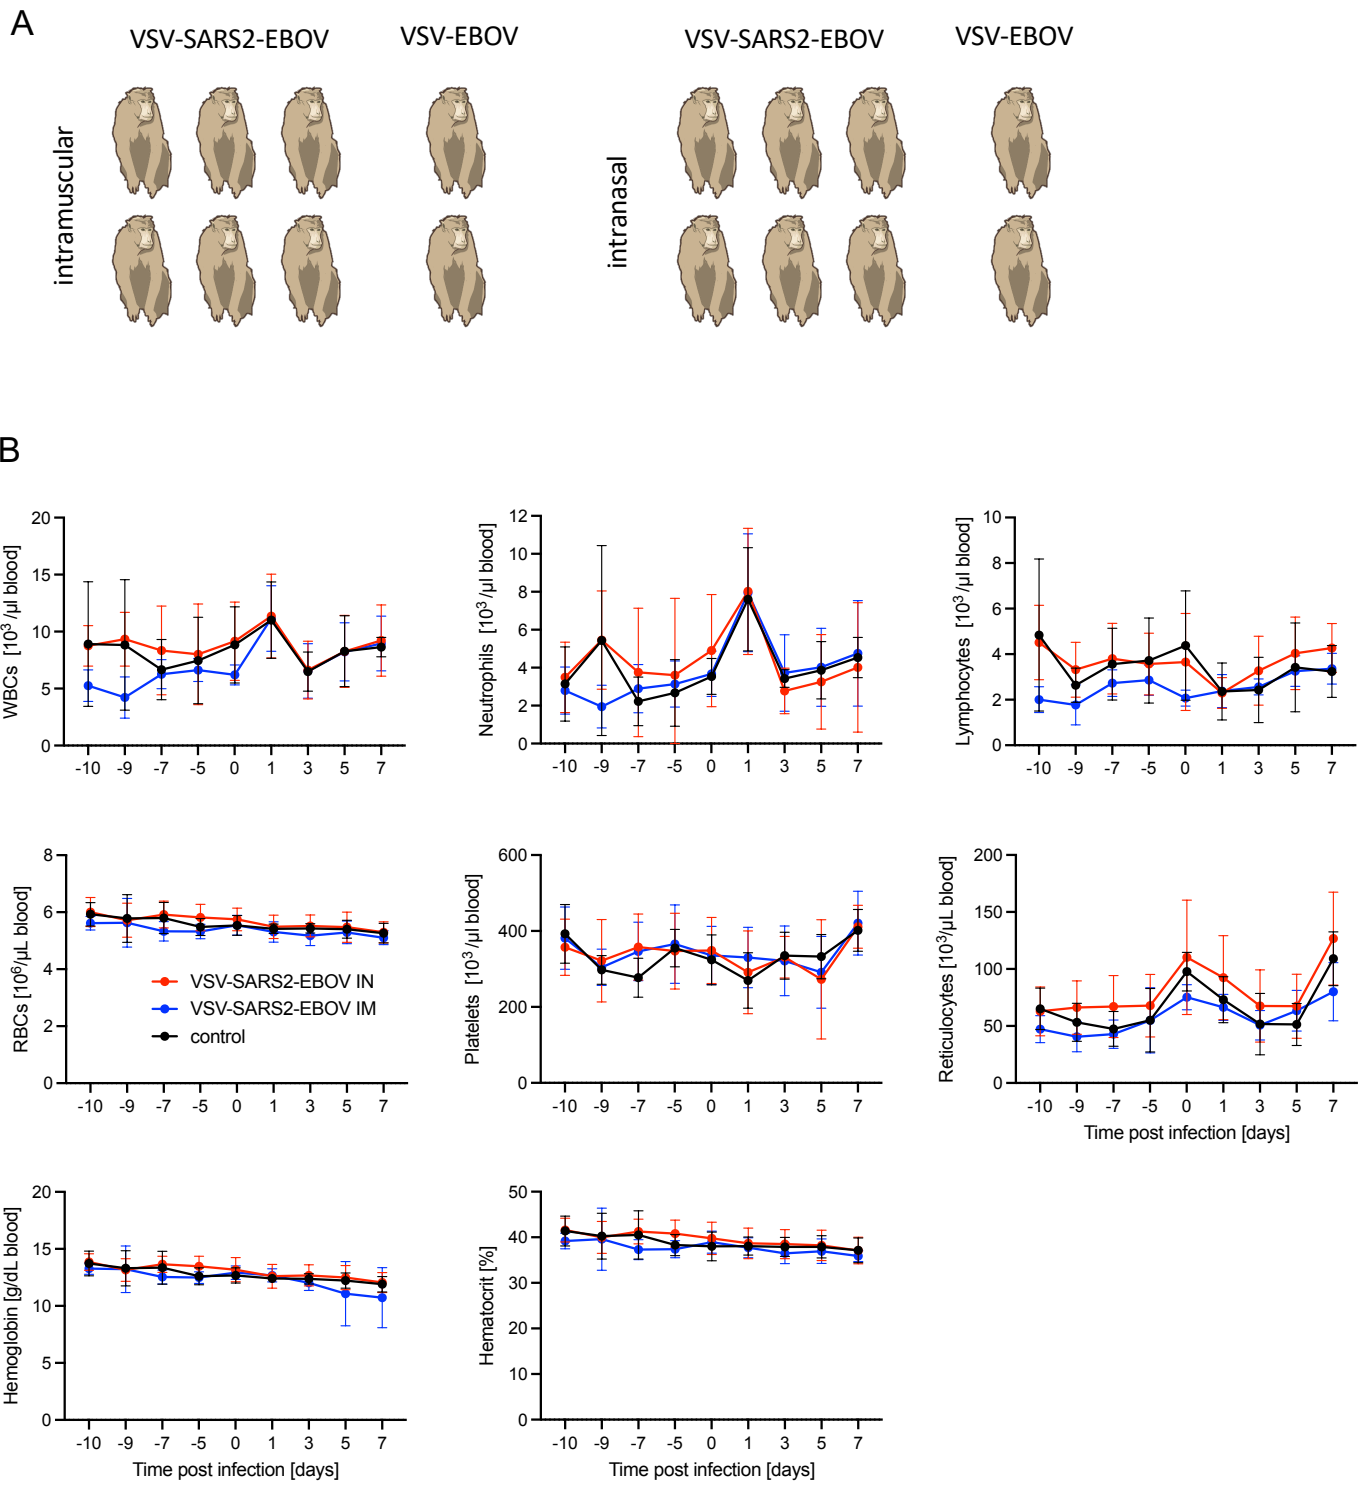

**Figure S2. NHP study outline and hematology.** (A) Schematic outline of the rhesus macaque study. (B) Levels of white blood cell (WBCs), neutrophils, lymphocytes, red blood cells (RBCs), platelets, reticulocytes, hemoglobin, and hematocrit in the blood of vaccinated and challenged NHPs.
